# Supplementary material for: A Mixed Methods Study of a Health Worker Training Intervention to Increase Syndromic Referral for Gambiense Human African Trypanosomiasis in South Sudan
Source: PubMed Central journal article supplement (PMC3961197; doi:10.1371/journal.pntd.0002742), 2014-03-20
Supplement: pntd.0002742.s002.pdf [file pntd.0002742.s002.pdf]

## Magwi County health worker questionnaire

### Personal Information

Q 1. The payam where I work is: (circle)

*Nimule Pageri Mugali Magwi Parajok Lobone*

Q 2. The type of place I work is: (circle)

*Public health centre/unit/hospital Private clinic*

*Military medical corps Traditional herbalist or witch doctor*

Q 3. Name of health facility: \_\_\_\_\_

Q 4. My job title is: \_\_\_\_\_

Q 5. My age is: (circle) *0-19 years 20-29 years 30-39 years*  
*40-49 years 50-59 years 60 years or older*

Q 6. I am: (circle) *Male Female*  
*Yes No*

Q. 7 I can read and write: (circle)

Q 8. My nationality is: (circle) *Sudanese Ugandan Other \_\_\_\_\_*

Q 9. My tribe is: (circle) *Madi Acholi Dinka Other \_\_\_\_\_*

Q 10. How long have you been working as a health worker in Magwi County? \_\_\_ years \_\_\_ months

### Health services information

Q 11. Are most (more than 70%) of your patients from one tribe? *Yes No*

If yes, which tribe are most of your patients from? *Madi Acholi Dinka Other \_\_\_\_\_*

Q 12. How many patients do **you, personally**, see on a typical day? (circle)

*0-5 6-10 11-15 16-20 21 or more*

Q 13. Are you able to do any tests for patients at your facility? (circle) *Yes No*

Q 14. If yes, what kinds of tests are you able to do? (circle)

*Malaria-RDT Malaria-microscope Typhoid Syphilis*

*Sleeping sickness-CATT*

*Sleeping sickness-microscope*

*HIV*

*Tuberculosis*

**Q 15.** How often are these tests or reagents available to use? (circle)

*Usually*

*Sometimes*

*Not very often*

## **Referral practices**

**Q 16.** Do you ever refer patients to another healthcare worker or facility? (circle)      *Yes*      *No*

**Q 17.** Where or who do you normally refer patients to? \_\_\_\_\_

**Q 18.** What are the most common conditions you refer patients for?

1 \_\_\_\_\_

2 \_\_\_\_\_

3 \_\_\_\_\_

4 \_\_\_\_\_

5 \_\_\_\_\_

**Q 19.** What is the most common reason you refer patients? (circle one answer)

*Emergency cases I can't treat myself*

*Non-emergency cases I can't treat myself*

*Cases I can normally treat, but can't at that moment because I don't have the drugs*

*Cases in which I don't know what is causing the problem*

*Other reason* \_\_\_\_\_

**Q 20.** When was the last time you referred a patient? (approximate date) \_\_\_\_\_

**Q 21.** Why did you refer that patient? \_\_\_\_\_

**Q 22.** How many patients did you refer yesterday? (circle)    *0*    *1-3*    *4-10*    *11 or more*

**Q 23.** How many patients have you referred in the last week? (circle)  
*0*    *1-3*    *4-10*    *11 or more*

**Q 24.** Do you currently keep any records on referrals made by you or your facility?      *Yes*      *No*

## **Sleeping sickness**

**Q 25.** Have you ever seen someone with sleeping sickness before?      *Yes*      *No*

**Q 26.** Since you have been working in Magwi County, have you ever suspected sleeping sickness in one of your patients before?      *Yes*      *No*

**Q 27.** If yes, did you refer them for a sleeping sickness test?      *Yes*      *No*

**Q 28.** How many patients have you referred for a sleeping sickness test in the last month?  
 (circle)      0      1      2      3      4      5 or more

**Q 29.** Where do you normally refer for a sleeping sickness test? \_\_\_\_\_

**Q 30.** In your opinion, how common a problem are the following illnesses in Magwi County: (circle)

|                    |                   |                        |                    |
|--------------------|-------------------|------------------------|--------------------|
| Malaria?           | <i>Not common</i> | <i>Somewhat common</i> | <i>Very common</i> |
| Typhoid?           | <i>Not common</i> | <i>Somewhat common</i> | <i>Very common</i> |
| Syphilis?          | <i>Not common</i> | <i>Somewhat common</i> | <i>Very common</i> |
| HIV?               | <i>Not common</i> | <i>Somewhat common</i> | <i>Very common</i> |
| Tuberculosis?      | <i>Not common</i> | <i>Somewhat common</i> | <i>Very common</i> |
| Sleeping sickness? | <i>Not common</i> | <i>Somewhat common</i> | <i>Very common</i> |
| Mental illness?    | <i>Not common</i> | <i>Somewhat common</i> | <i>Very common</i> |
| Drunkenness?       | <i>Not common</i> | <i>Somewhat common</i> | <i>Very common</i> |
| Poisoning?         | <i>Not common</i> | <i>Somewhat common</i> | <i>Very common</i> |

**Q 31.** Of these problems just listed, which do you feel are the three most important problems in this area?

1. \_\_\_\_\_ 2. \_\_\_\_\_ 3. \_\_\_\_\_

**Q 32.** Is this a sign or symptom of sleeping sickness?

|                                             |     |    |                     |
|---------------------------------------------|-----|----|---------------------|
| Fever for 2 days                            | Yes | No | <i>I don't know</i> |
| Fever for a week or more                    | Yes | No | <i>I don't know</i> |
| Severe headache                             | Yes | No | <i>I don't know</i> |
| Cough                                       | Yes | No | <i>I don't know</i> |
| Itching skin                                | Yes | No | <i>I don't know</i> |
| Daytime sleeping                            | Yes | No | <i>I don't know</i> |
| Loss of appetite                            | Yes | No | <i>I don't know</i> |
| Increase in appetite                        | Yes | No | <i>I don't know</i> |
| Abdominal pains                             | Yes | No | <i>I don't know</i> |
| Difficulty walking                          | Yes | No | <i>I don't know</i> |
| Infertility                                 | Yes | No | <i>I don't know</i> |
| Convulsions                                 | Yes | No | <i>I don't know</i> |
| Not wanting to talk to others               | Yes | No | <i>I don't know</i> |
| Seeing or hearing things that are not there | Yes | No | <i>I don't know</i> |

**Q 33.** What do you hope to get out of this workshop? \_\_\_\_\_

---
